# Supplementary material for: Comparison of Different Grades of Innovative Tanyang Congou Black Tea (Minkehong) Based on Metabolomics and Sensory Evaluation
Source: MDPI journal article supplement (doi:10.3390/horticulturae10040374), 2024-04-08
Supplement: s1 [file s1]

Archive with 3 entries (3 files):
- Figure S1.pdf
- Figure S2.pdf
- Figure S3.pdf
