# Supplementary material for: Comparison of Different Grades of Innovative Tanyang Congou Black Tea (Minkehong) Based on Metabolomics and Sensory Evaluation
Source: MDPI journal article supplement (doi:10.3390/horticulturae10040374), 2024-04-08
Supplement: s1 [file s1]

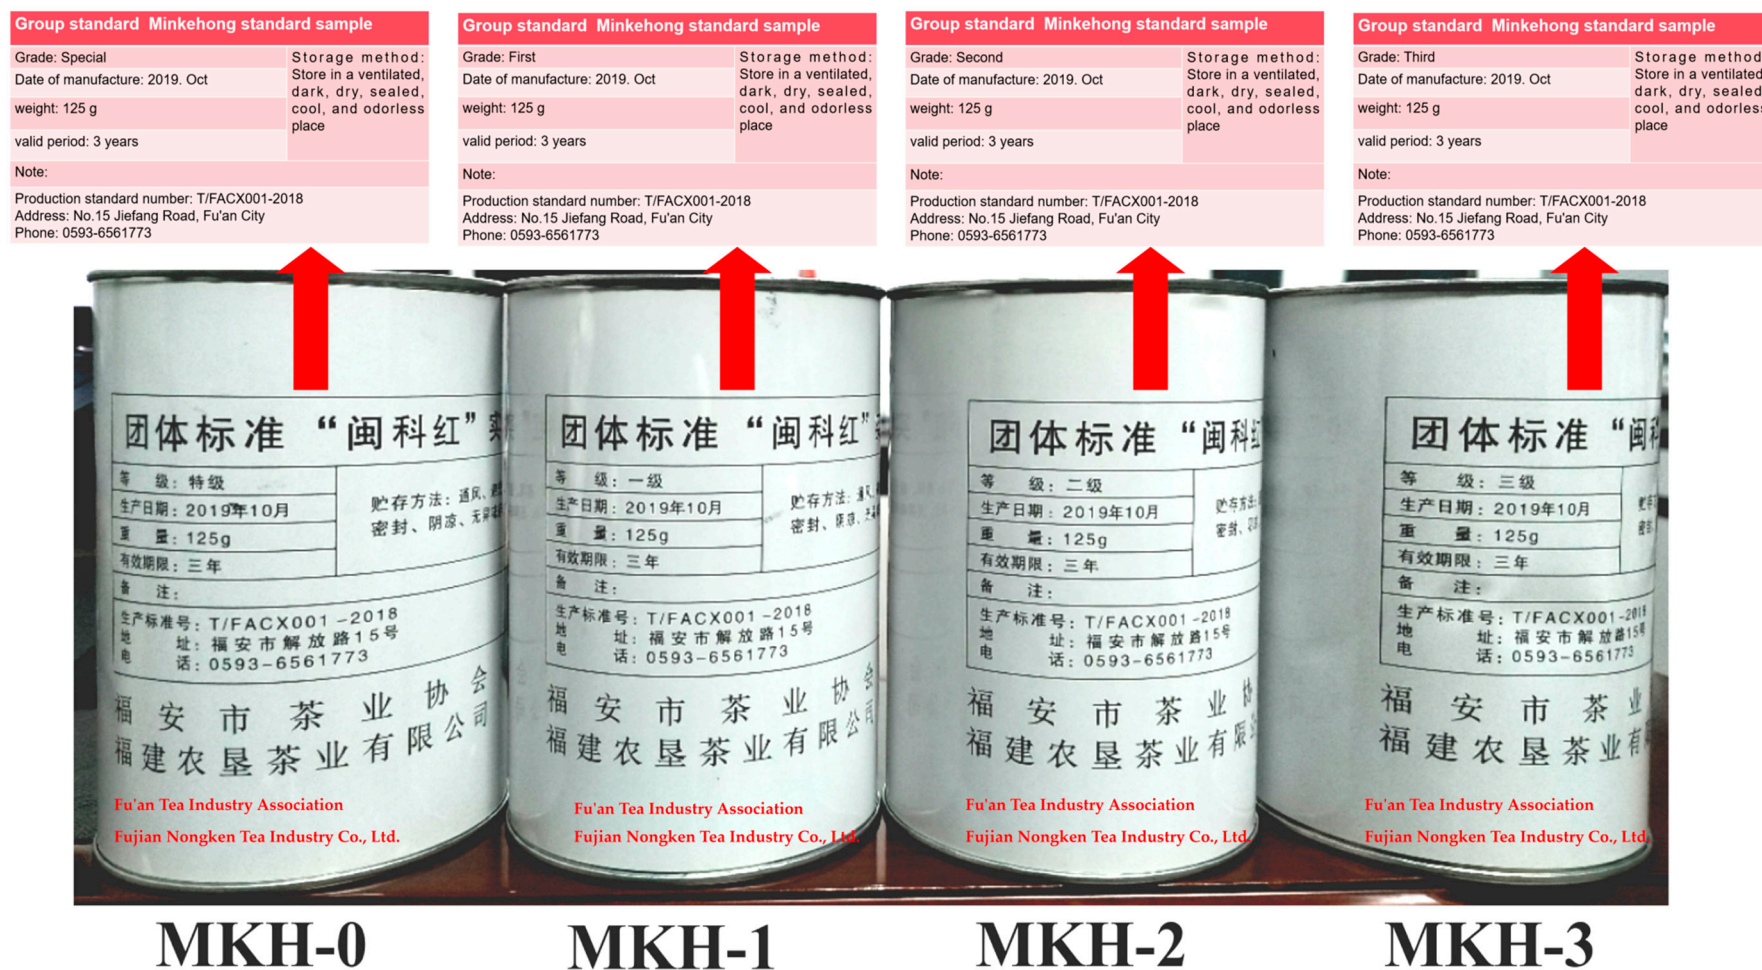

**Figure S2.** The packaging of four standard sample of Minkehong (MKH)

MKH-0 (Minkehong\_Te) , MKH-1 (Minkehong\_1) , MKH-2 (Minkehong\_2) , and MKH-3 (Minkehong\_3) represents the four levels (Te, 1, 2, 3) of MKH, respectively.
