# Supplementary figures and images for: Comparison of Different Grades of Innovative Tanyang Congou Black Tea (Minkehong) Based on Metabolomics and Sensory Evaluation
Source: MDPI journal article supplement (doi:10.3390/horticulturae10040374), 2024-04-08

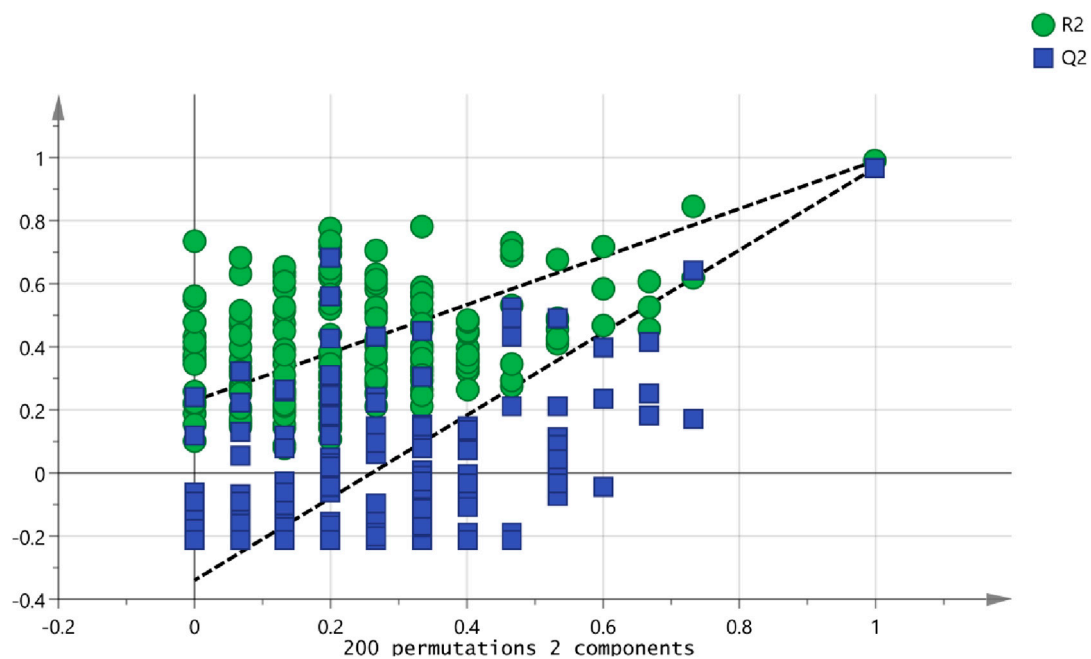

**Figure S3.** Validation of the PLS-DA model of different grades of Mingkehong

Supplement: s1 [file s1]
